# Supplementary material for: A lateral strip assay for ultrasensitive detection of glyphosate in soybeans and corn
Source: Royal Society of Chemistry journal article supplement (doi:10.1039/d4an00958d), 2024-01-01
Supplement: d4an00958d1.pdf [file d4an00958d1.pdf]

1            **A lateral strip assay for ultrasensitive detection of**  
2                            **glyphosate in soybeans and corn**  
3                            **(Supporting information)**

#### 4 **Contents**

- 5 **Fig. S1.** The verification of intermediates. (a) The LC/MS-MS of intermediate 2. (b)  
6 The <sup>1</sup>HNMR of intermediate 3. (c) The LC/MS-MS of intermediate 4. (d) The LC/MS-  
7 MS of intermediate 5.
- 8 **Fig. S2.** The LC-MS/MS results of samples and GLY standard solution. (a)The  
9 soybeans sample. (b)The corn sample. (c)The GLY standard solution.

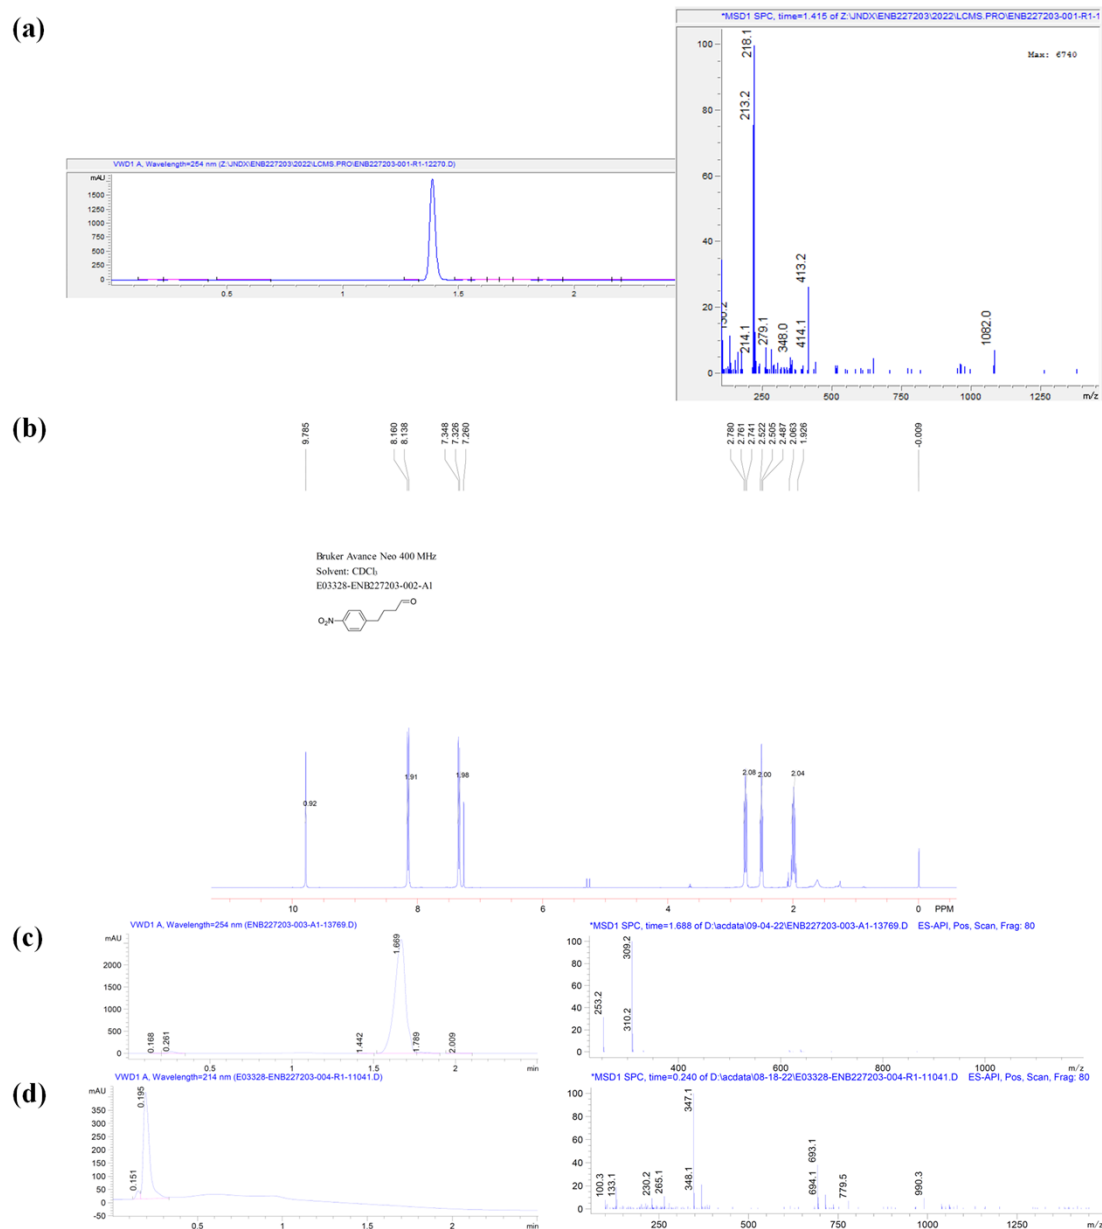

10

11 **Fig. S1.** The verification of intermediates. (a) The LC/MS-MS of intermediate 2. (b)  
 12 The  $^1\text{H}$ NMR of intermediate 3. (c) The LC/MS-MS of intermediate 4. (d) The LC/MS-  
 13 MS of intermediate 5.

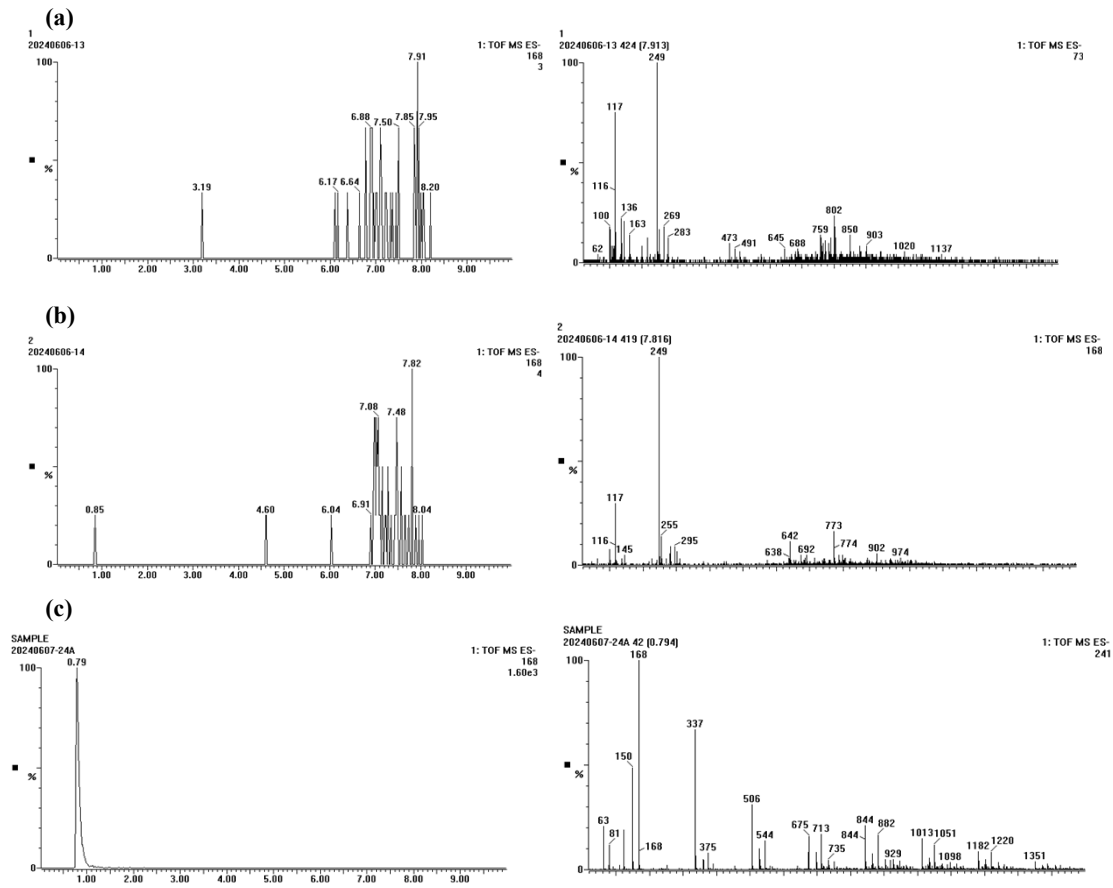

14

15 **Fig. S2.** The LC-MS/MS results of samples and GLY standard solution. (a)The  
 16 soybeans sample. (b)The corn sample. (c)The GLY standard solution.
